# Supplementary material for: Nanomolar inhibition of SARS-CoV-2 infection by an unmodified peptide targeting the prehairpin intermediate of the spike protein
Source: Proc Natl Acad Sci U S A. 2022 Sep 19;119(40):e2210990119. doi: 10.1073/pnas.2210990119 (PMC9546559; doi:10.1073/pnas.2210990119)
Supplement: Supplementary File [file pnas.2210990119.sapp.pdf]

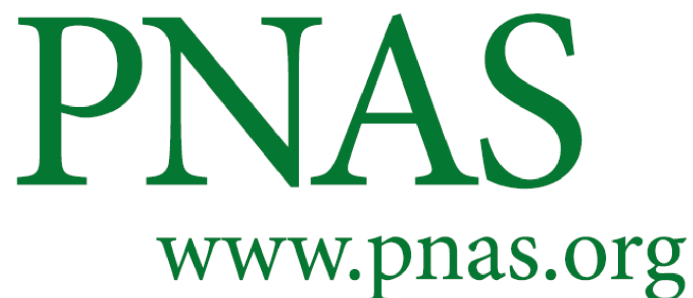

**Supplementary Information for**

Nanomolar inhibition of SARS-CoV-2 infection by an unmodified peptide targeting the prehairpin intermediate of the spike protein

Kailu Yang, Chuchu Wang, Alex J. B. Kreutzberger, Ravi Ojha, Suvi Kuivanen, Sergio Couoh-Cardel, Serena Muratcioglu, Timothy J. Eisen, K. Ian White, Richard G. Held, Subu Subramanian, Kendra Marcus, Richard A. Pfuetzner, Luis Esquivies, Catherine A. Doyle, John Kuriyan, Olli Vapalahti, Giuseppe Balistreri, Tom Kirchhausen, Axel T. Brunger

\*Corresponding author: Axel T. Brunger; Tom Kirchhausen

**Email:** [brunger@stanford.edu](mailto:brunger@stanford.edu); [kirchhausen@crystal.harvard.edu](mailto:kirchhausen@crystal.harvard.edu)

**This PDF file includes:**

Figures S1 to S12

Tables S1 to S2

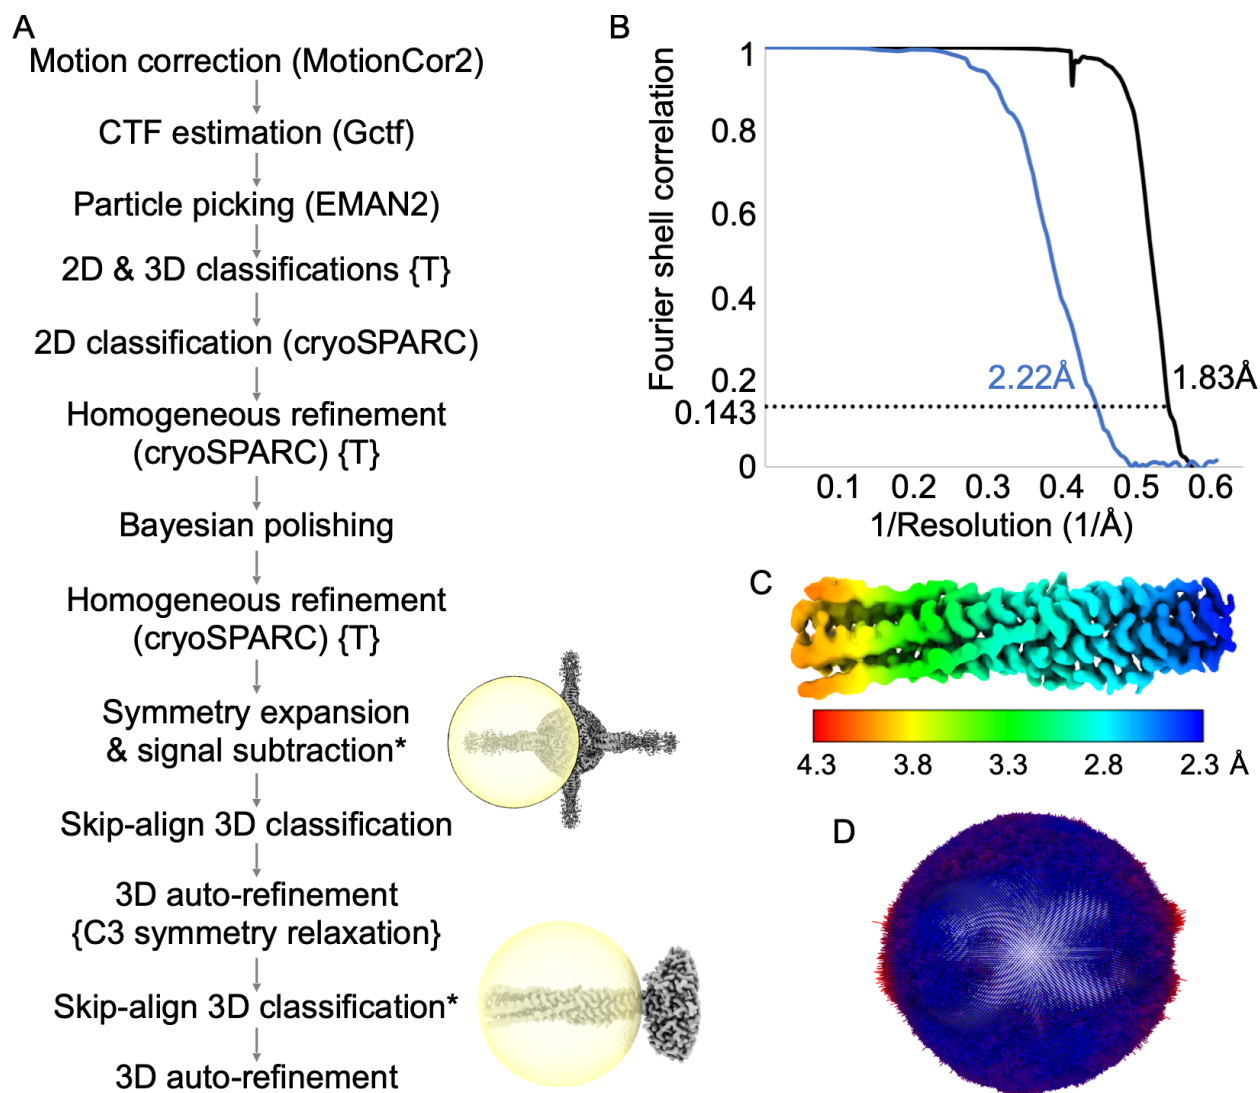

**Fig. S1.** Cryo-EM structure determination. (A) Workflow of cryo-EM data processing. RELION was used for each step unless another program is indicated in parenthesis. Symmetry was imposed or relaxed as indicated in curly brackets. The steps that used a manually generated mask (rather than the default spherical mask in RELION or the default dynamic masks in cryoSPARC) are indicated with a star sign and an image showing the manually generated mask (yellow) and an average map (gray). (B) Fourier shell correlations (FSC) of the final refinement step with cryoSPARC (second “homogeneous refinement” using cryoSPARC, black curve) and the final local refinement with RELION (last 3D auto-refinement, blue curve). Note that these FSC calculations were performed using the default spherical mask that covers both the HR1HR2 bundle and part of the scaffold. (C) The final reconstruction of the HR1HR2 bundle colored by local resolutions. (D) Distribution of the particles’ orientations in the final reconstruction, depicted in the same orientation as the map in **c**. The length of each bar is proportional to the number of particles oriented in that direction. The bars are also colored based on the length, with red meaning more particles and blue meaning less particles.

## Replicate 1

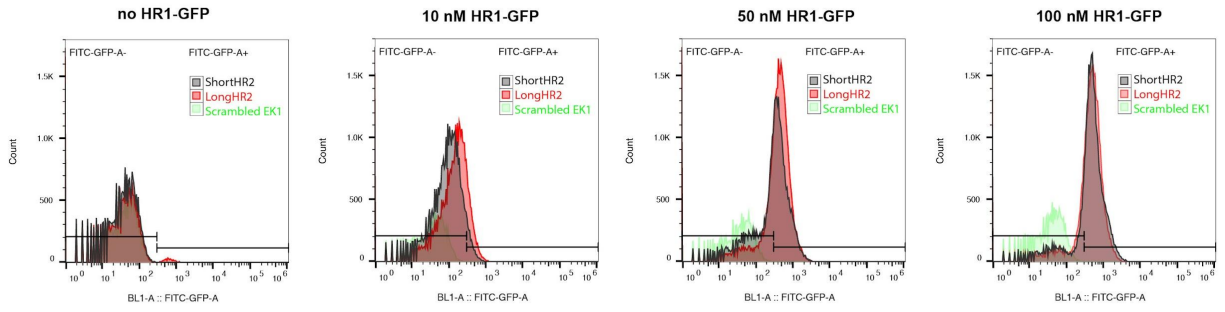

## Replicate 2

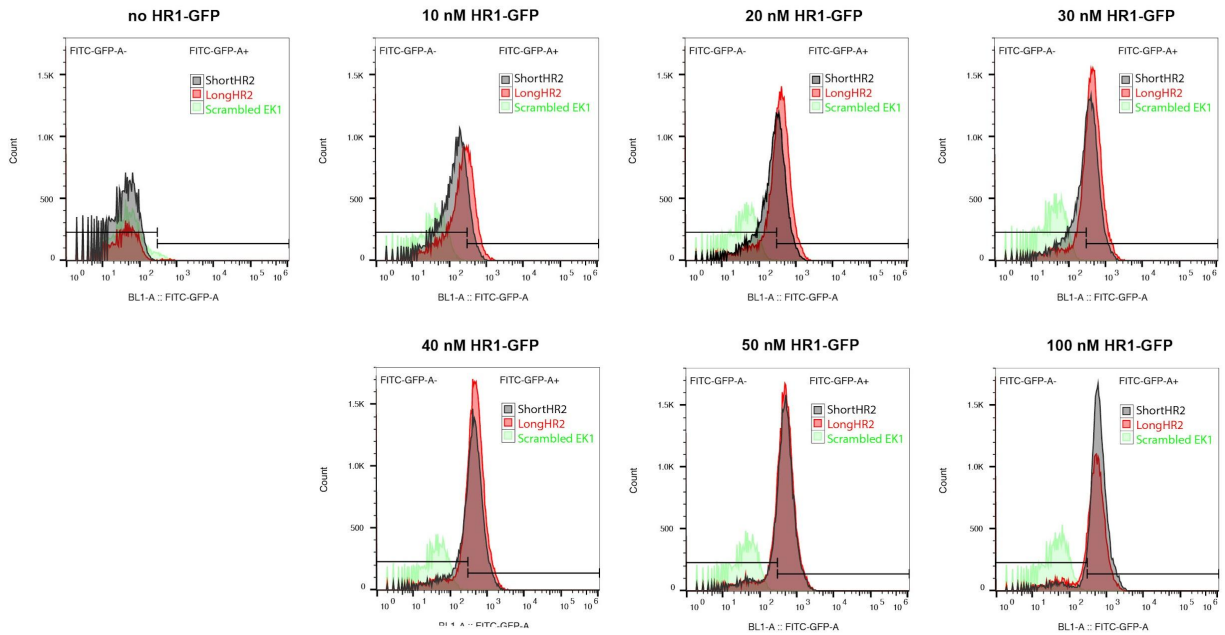

**Fig. S2.** Flow cytometry histograms of HR1-GFP binding by surface-displayed longHR2\_42, shortHR2, and the scrambled EK1 control. Cells displaying either peptide were incubated with different concentrations of HR1-GFP protein and the GFP signal was quantified to compare the binding levels. Regions corresponding to cells were identified using Forward (FSC) and Side-Scatters (SSC), and gates were set to include only these events in the experiments with labeled samples. Gates for the binding analysis were defined using unlabeled cells (no HR1-GFP) and the scrambled EK1 control.

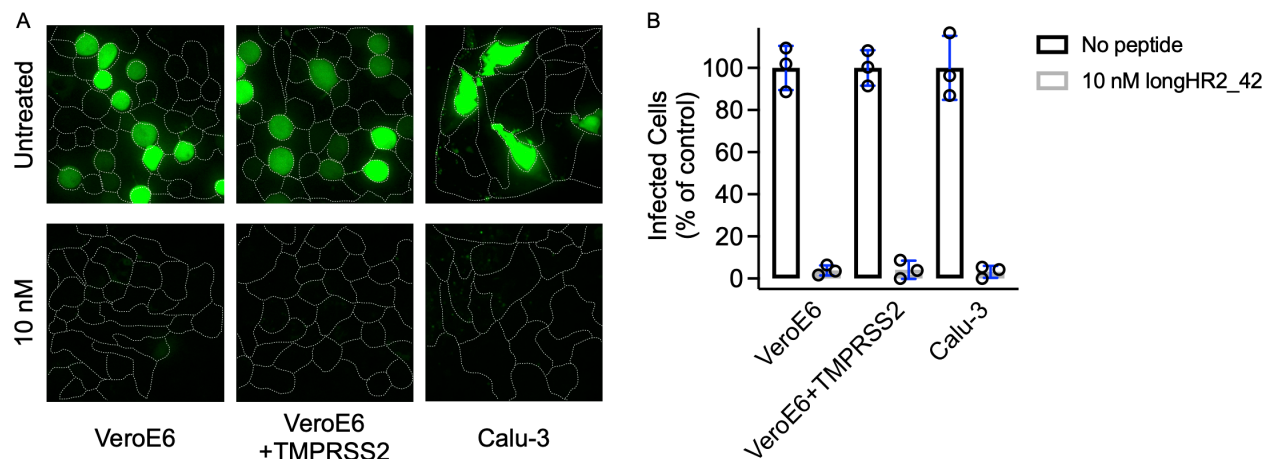

**Fig. S3.** The strong inhibitory effect of longHR2\_42 on VSV-SARS-CoV-2 is independent of cell types with differential expression of host cell proteases (A and B). Infection (MOI of 0.5) was determined in the absence or presence of 10 nM longHR2 in VeroE6 (cathepsin only), VeroE6+TMPRSS2 (cathepsin and TMPRSS2), and the human lung cell line Calu-3 (TMPRSS2 only). (A) Example images are maximum intensity projections of 20  $\mu\text{m}$  with 1  $\mu\text{m}$  z-plane spacing taken on a spinning disc-confocal with eGFP expression allowing for infection to be determined. Cell outlines were obtained from a WGA-Alexa647 membrane stain.

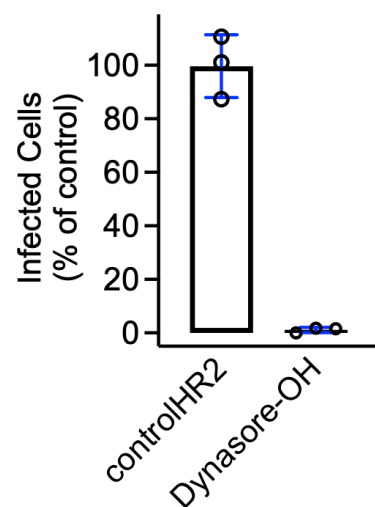

**Fig. S4.** In the HR2 washout experiment, incubation of cells with controlHR2 had no effect on infection, while keeping dynasore-OH constant throughout the experiment completely inhibited infection.

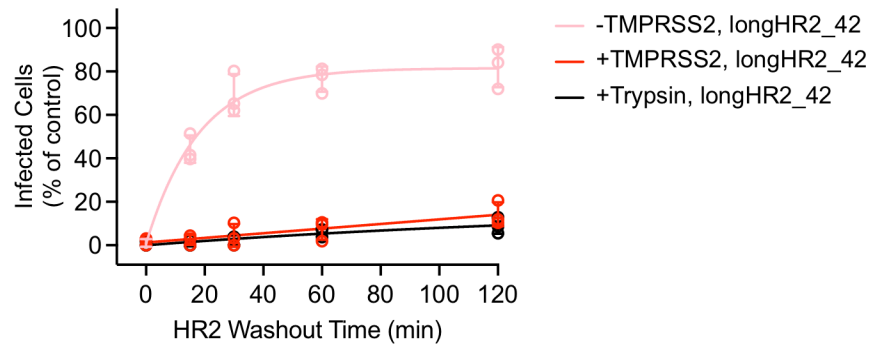

**Fig. S5.** Trypsin treatment in TMPRSS2-negative VeroE6 cells shows similar inhibition as that of using TMPRSS2-expressing VeroE6 cells in the HR2 washout experiment. The VSV-SARS-CoV-2-Wuh chimera was treated with 1  $\mu$ M trypsin for 30 min at 37°C followed by 10  $\mu$ M Aprotinin, a trypsin inhibitor, before adding to the cells. Otherwise, the trypsin experiment was performed with the same condition as that of Fig. 3E.

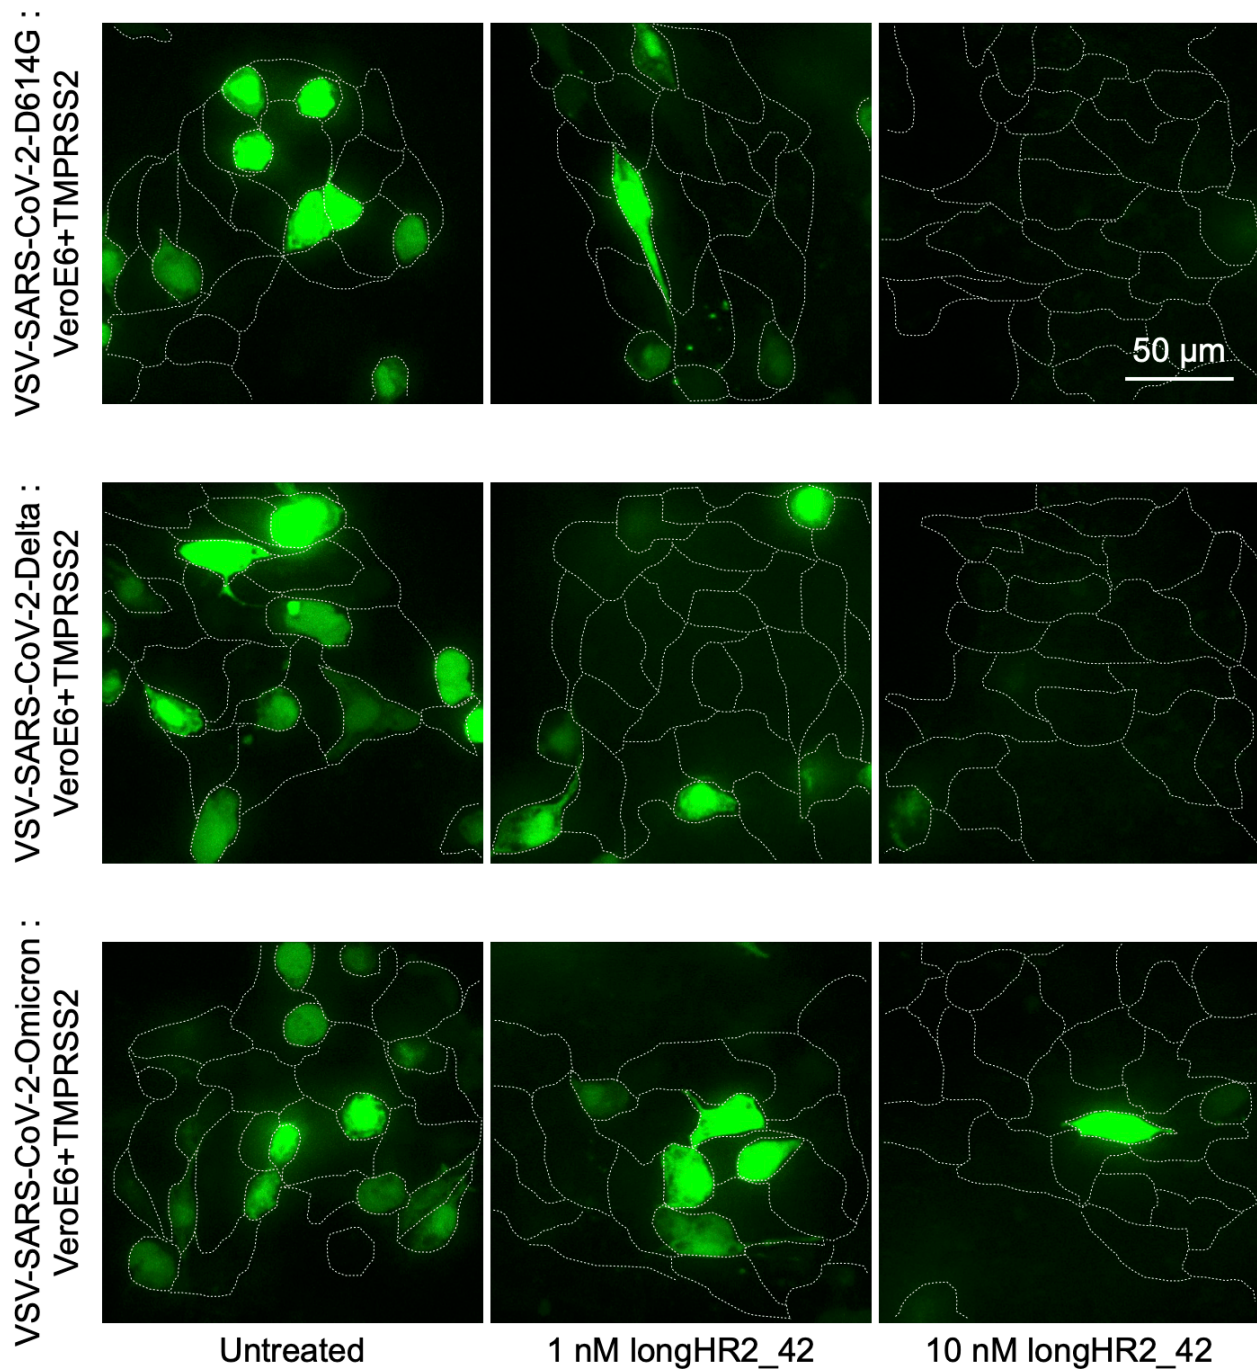

**Fig. S6.** Example images of the inhibition of VSV-SARS-CoV-2-D614G, -Delta, and -Omicron infection by longHR2\_42. Example images are maximum intensity projections of 20  $\mu\text{m}$  with 1  $\mu\text{m}$  z-plane spacing taken on a spinning disc-confocal with eGFP expression allowing for infection to be determined. Cell outlines were obtained from a WGA-Alexa647 membrane stain.

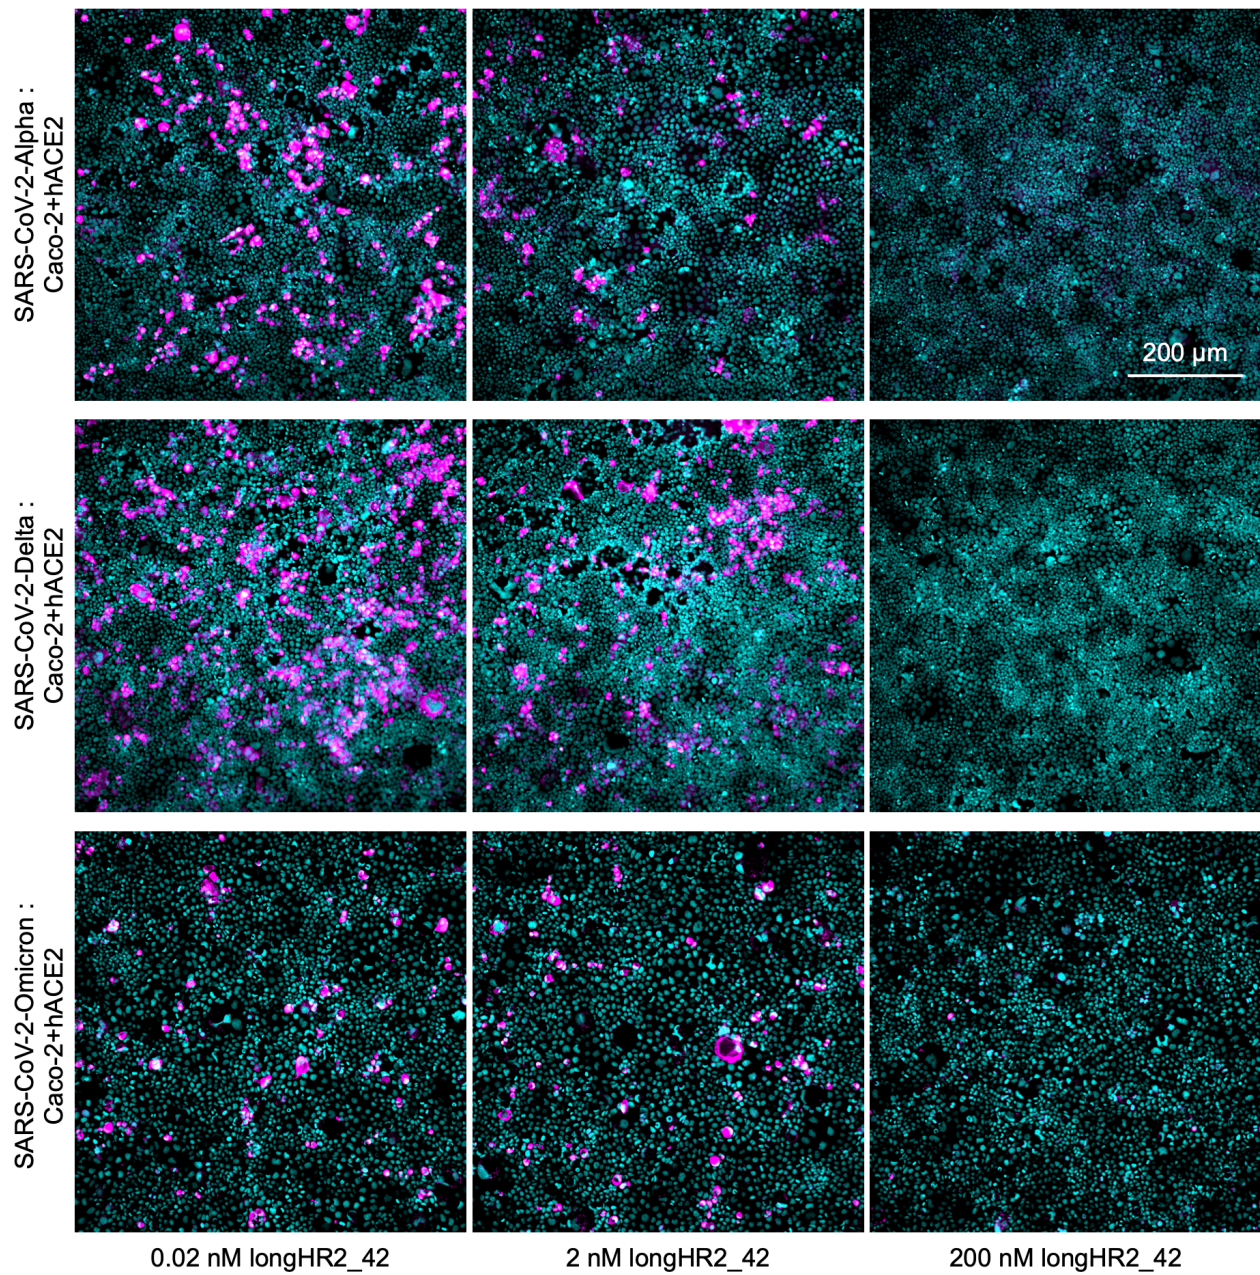

**Fig. S7.** Example images of the inhibition of SARS-CoV-2-Alpha, -Delta, and -Omicron infection by longHR2\_42. The infected cells are detected by an antibody specific for the viral N protein (magenta) and nuclei by Hoechst DNA dye (cyan).

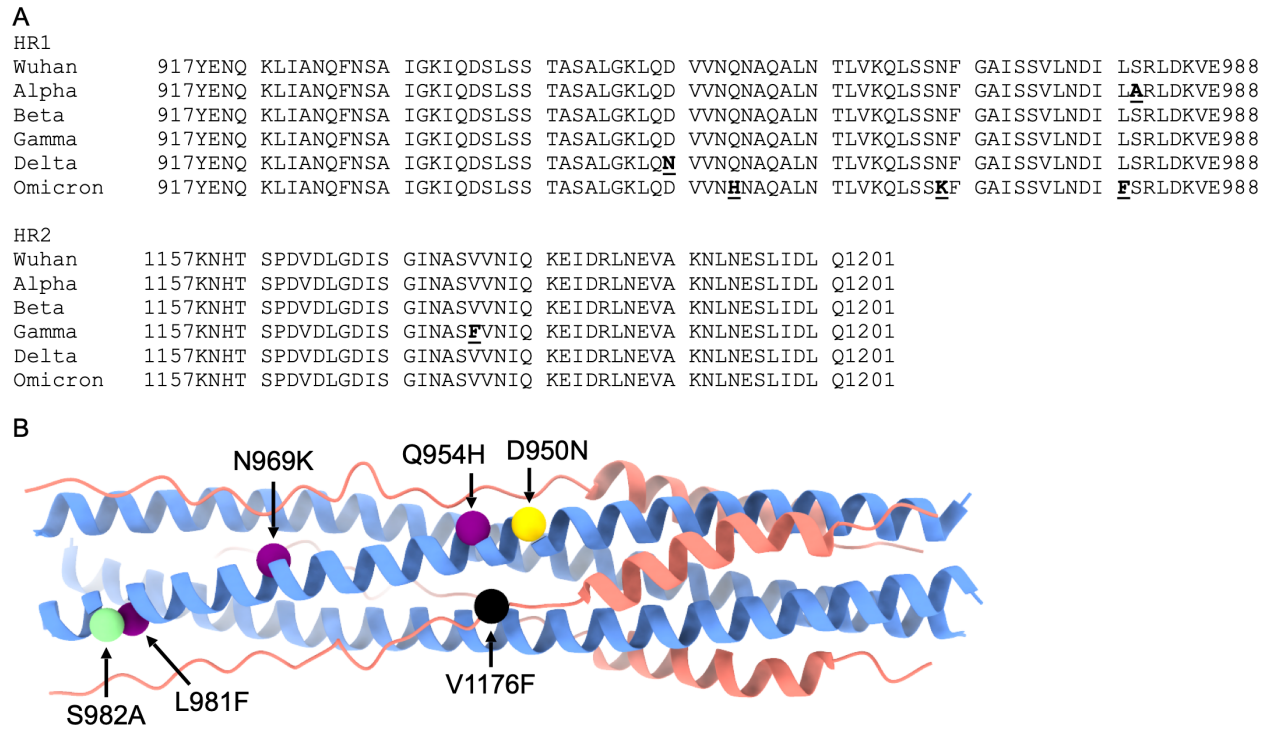

**Fig. S8.** Mutations of SARS-CoV-2 variants of concern in the HR1HR2 region. (A) Sequence alignment of the HR1HR2 region of SARS-CoV-2 variants. (B) Locations of mutations in the 3D structure of HR1HR2 (PDB id 8czi). Color code: blue for HR1, red for HR2, green for Alpha, black for Gamma, yellow for Delta, and purple for Omicron.

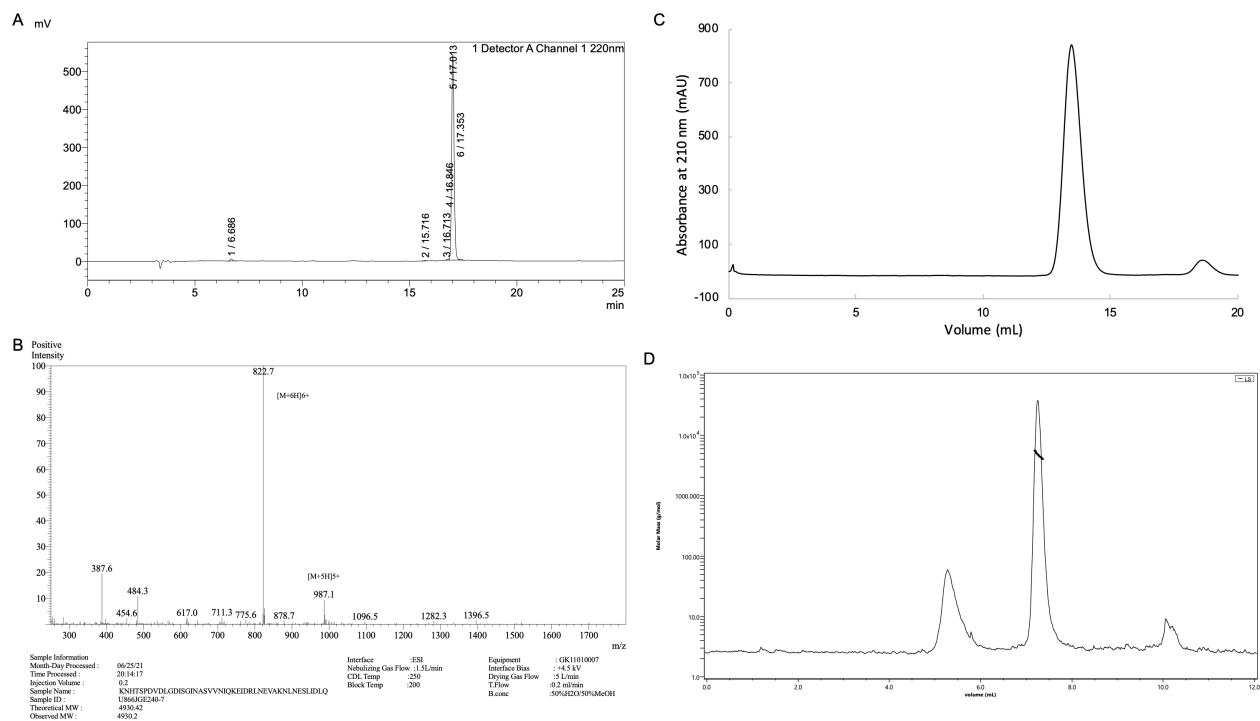

**Fig. S9.** HPLC (A), LC-MS (B), SEC (C), and SEC-MALS (D) profiles of longHR2\_45. The molecular weight measured by SEC-MALS is 4.8 kDa, close to 4.9 kDa, the theoretical monomer molecular weight.

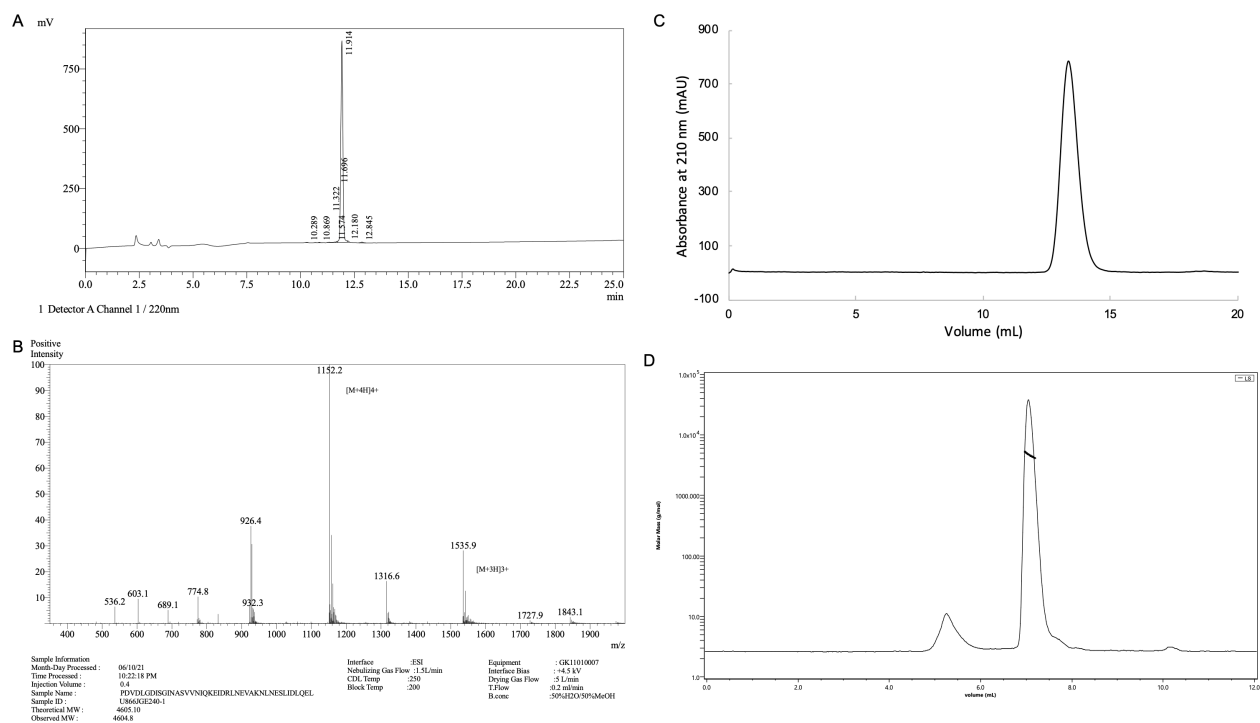

**Fig. S10.** HPLC (A), LC-MS (B), SEC (C), and SEC-MALS (D) profiles of longHR2\_42. The molecular weight measured by SEC-MALS is 4.7 kDa, close to 4.6 kDa, the theoretical monomer molecular weight.

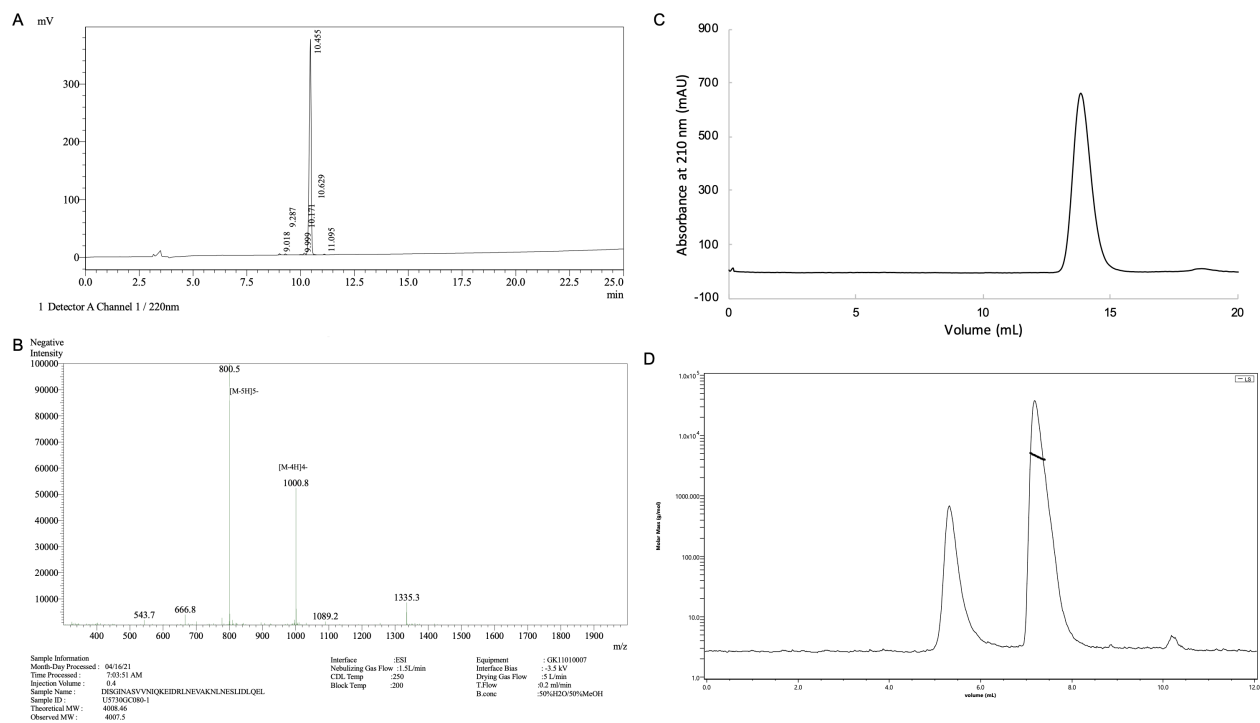

**Fig. S11.** HPLC (A), LC-MS (B), SEC (C), and SEC-MALS (D) profiles of shortHR2. The molecular weight measured by SEC-MALS is 4.5 kDa, close to 4.0 kDa, the theoretical monomer molecular weight.

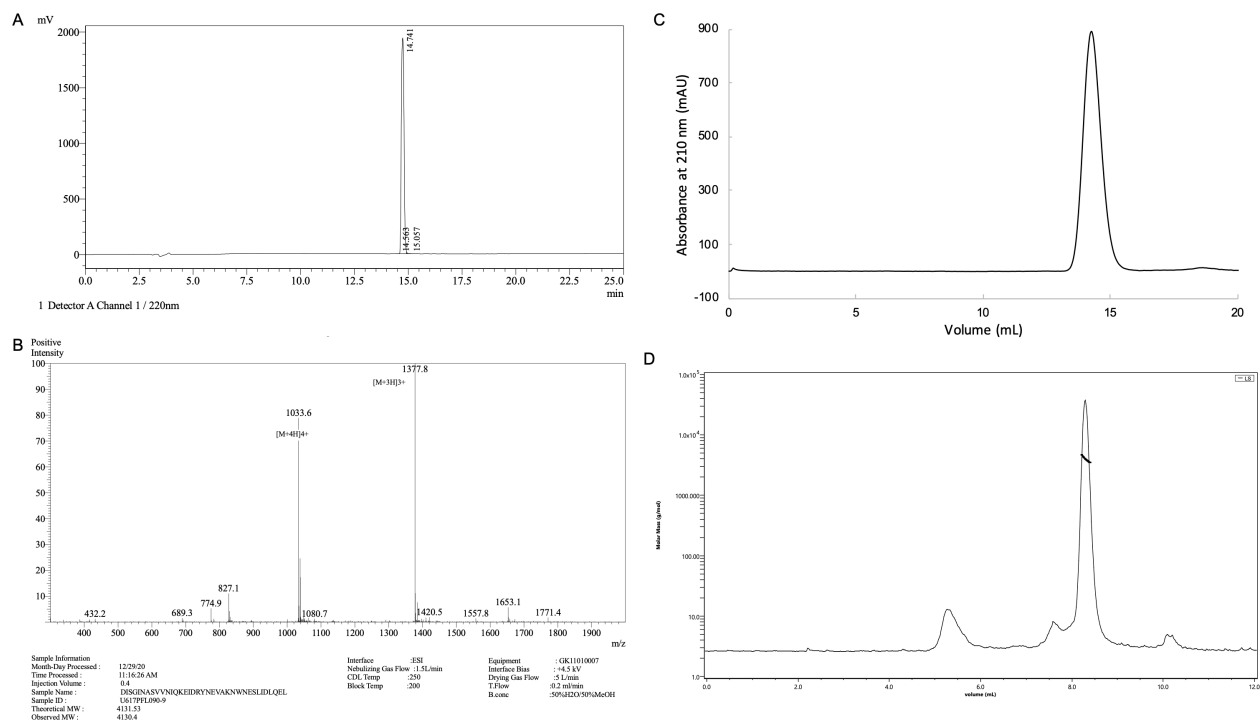

**Fig. S12.** HPLC (A), LC-MS (B), SEC (C), and SEC-MALS (D) profiles of controlHR2. The molecular weight measured by SEC-MALS is 4.0 kDa, close to 4.1 kDa, the theoretical monomer molecular weight.

**Table S1.** Cryo-EM data collection, refinement, and model building.

|                                                      |                      |
|------------------------------------------------------|----------------------|
|                                                      | EMDB-27098, PDB 8czi |
| Microscope                                           | Titan Krios          |
| Voltage (kV)                                         | 300                  |
| Camera                                               | Gatan K3             |
| Pixel size (Å)                                       | 0.653                |
| Exposure time (s)                                    | 1                    |
| Number of frames per exposure                        | 40                   |
| Total Dose (e <sup>-</sup> /Å <sup>2</sup> )         | 47                   |
| Number of movies                                     | 18,846               |
| Defocus range (μm)                                   | -2 to -0.3           |
| Number of particles                                  | 751,443              |
| Resolution of final global refinement (0.143 FSC, Å) | 1.83                 |
| Resolution of final local refinement (0.143 FSC, Å)  | 2.22                 |
| Bond RMSD (Å)                                        | 0.004                |
| Angle RMSD (°)                                       | 0.333                |
| Molprobity score                                     | 1.37                 |
| Clashscore, all atoms                                | 6.62                 |
| Ramachandran favored (%)                             | 100                  |
| Ramachandran allowed (%)                             | 0                    |
| Ramachandran outliers (%)                            | 0                    |
| Rotamer outliers (%)                                 | 0                    |
| Cβ outliers (%)                                      | 0                    |
| CaBLAM outliers (%)                                  | 0                    |

**Table S2.** Read counts of variants sequenced during mRNA display.

| Variant              | 0 nM<br>input | 10 nM<br>input | 32 nM<br>input | 100 nM<br>input | 0 nM<br>eluate | 10 nM<br>eluate | 32 nM<br>eluate | 100 nM<br>eluate |
|----------------------|---------------|----------------|----------------|-----------------|----------------|-----------------|-----------------|------------------|
| Scrambled<br>peptide | 65952         | 73405          | 52473          | 67097           | 2501           | 2765            | 449             | 657              |
| shortHR2             | 2105.19       | 2726.64        | 1687.21        | 2044.18         | 203.721        | 618.968         | 1812.75         | 2661.66          |
| longHR2_42           | 17948.6       | 25428.5        | 17014.4        | 22193.4         | 2156.4         | 10647.3         | 30756           | 44710.5          |
